# Supplementary material for: Brevican, Neurocan, Tenascin-C, and Tenascin-R Act as Important Regulators of the Interplay Between Perineuronal Nets, Synaptic Integrity, Inhibitory Interneurons, and Otx2
Source: Frontiers journal article supplement (doi:10.3389/fcell.2022.886527), 2022-06-02
Supplement: Presentation_1.pdf [file Presentation_1.pdf]

## 1 16 Supplementary FIGURE LEGENDS

2 **Supplementary figure 1: Distribution of brevicin, neurocan, tenascin-C and tenascin-R in the**  
3 **adult cerebral cortex. (A-D)** Immunohistochemical stainings of brevicin in adult murine coronal  
4 brain sections. Stainings revealed brevicin-positive cells with a PNN-like structure (white arrows) in  
5 the RSC and V1 of adult wildtype mice. The antibody also showed unspecific stained blood vessels.  
6 In the V2M and Aud no cell attached brevicin was detected. **(E-H)** Immunohistochemical stainings of  
7 neurocan in adult murine coronal brain sections. Stainings against neurocan exhibited positive cells in  
8 all regions. Immunoreactivity appeared to be especially strong in the V1 region. **(I-L)**  
9 Immunohistochemical stainings of tenascin-C in adult murine coronal brain sections. The tenascin-C  
10 staining could only detect unspecific background signal in all regions. Therefore, tenascin-C seems to  
11 be not present in the examined adult cortical areas. **(M-P)** Immunohistochemical stainings of tenascin-  
12 R in adult murine coronal brain sections. Tenascin-R stainings showed positive cells in RSC, V2M,  
13 V1, and Aud with an PNN like appearance (white arrows). But also, tenascin-R positive signal in the  
14 neuropil was detected by the staining. Aud = auditory cortex, V1 = primary visual cortex, V2 =  
15 secondary visual cortex, RSC = retrosplenial cortex, scale bars = 200  $\mu\text{m}$ .

16  
17 **Supplementary Figure 2: Diminished PNN organization in the retrosplenial-, secondary visual- and**  
18 **auditory cortex of quadruple knockout mice. (A-F)** Immunohistochemical staining of PNNs in murine  
19 coronal brain slices with WFA (green) and anti-aggrecan (red). Images of WFA-positive and aggrecan-  
20 positive PNN-enwrapped neurons were taken and counted in the retrosplenial-, secondary visual- and  
21 auditory cortex. **(G)** A significantly reduced number of WFA-positive cells in the retrosplenial-,  
22 secondary visual- and auditory cortex of quadruple knockout mice could be noticed ( $p < 0.001$ ,  $N = 7$ ).  
23 **(H)** Also, the number of aggrecan-positive cells was significantly reduced in retrosplenial-, secondary  
24 visual- and auditory cortex of quadruple Knockout mice ( $p < 0.001$ ,  $N = 7$ ). **(I, J)** The number of WFA-  
25 positive and aggrecan-positive processes per PNN were counted in retrosplenial-, secondary visual-,  
26 primary visual- and auditory cortex. Both, WFA-positive and aggrecan-positive processes were  
27 significantly reduced in the examined cortical areas ( $p < 0.001$ ,  $N = 7$ ); 4xKO = quadruple knockout,  
28 Aud = auditory cortex, V1 = primary visual cortex, V2 = secondary visual cortex, RSC = retrosplenial  
29 cortex, WFA = Wisteria floribunda agglutinin, WT = wildtype, \*\*\* =  $p < 0.001$  data are shown as  
30 mean  $\pm$  SEM and SD, scale bars = 20  $\mu\text{m}$ .

31 **Supplementary figure 3: Analyses of synaptic puncta and spatial proximity between PNNs and**  
32 **gephyrin. (A)** Representative images of immunohistochemical stainings of PNNs and inhibitory  
33 synaptic elements. WFA is used as marker for PNNs (blue), antibodies against gephyrin (green) and  
34 VGAT (red) as markers for inhibitory postsynaptic elements and inhibitory presynaptic elements,  
35 respectively. **(B)** Immunopositive signal of gephyrin and VGAT was recognized as synaptic puncta  
36 and represented as spots by fitting about the estimated puncta size of 0,3  $\mu\text{m}$  and reaching the default  
37 intensity threshold. Immunoreactive signals not fitting these parameters were ignored as background  
38 noise. Synaptic spots of gephyrin and VGAT within a radius of 1  $\mu\text{m}$  of each other were defined as  
39 colocalized and illustrated as green transparent or red transparent spots (yellow arrows). Gephyrin and  
40 VGAT spots outside of this radius were defined as non-colocalized and illustrated in dark green or  
41 rather dark red (orange arrows). **(D-E)** Representative wildtype PNN (blue) with gephyrin-positive  
42 synaptic puncta. Signal outside the PNN was suppressed. The overview image creates the impression  
43 of overlapping WFA and gephyrin signal. A close-up image shows that the signals are not overlapping  
44 but gephyrin-positive signal occurs in the immediate surrounding of WFA-positive PNN components.  
45 VGAT = vesicular GABA transporter, WFA = Wisteria floribunda agglutinin, scale bars = 0.3  $\mu\text{m}$ .

46

47 **Supplementary Figure 4:** Inhibitory synaptic elements in the V1 of quadruple knockout mice. (A)  
 48 Western blot analysis of gephyrin protein levels in the V1. (B) No significant differences in the  
 49 gephyrin protein band intensity were detectable in visual cortex tissue of wildtype and quadruple  
 50 knockout mice ( $p = 0.16$ ,  $N = 8$ ). (C) RT-qPCR analyses revealed a comparable *Gephn* mRNA  
 51 expression in the visual cortex of wildtype and quadruple knockout mice ( $p = 0.07$ ,  $N = 6$ ). (D) Western  
 52 blot analysis of gephyrin protein levels in the V1. (E) Comparable VGAT protein band intensity in  
 53 visual cortex tissue of wildtype and quadruple knockout ( $p = 0.14$ ,  $N = 8$ ). (F) RT-qPCR analyses  
 54 revealed a significant lower *Slc32a1*(VGAT) mRNA expression in the visual cortex of quadruple  
 55 knockout mice ( $p < 0.001$ ,  $N = 6$ ); 4xKO = quadruple knockout, *Gephn* = *Gephyrin*, V1 = primary  
 56 visual cortex, VGAT = vesicular GABA transporter, WT = wildtype, \* =  $p < 0.05$  data are shown as  
 57 mean  $\pm$  SEM and SD.

58 **Supplementary Figure 5:** Excitatory synaptic elements in the V1 of quadruple knockout mice. (A)  
 59 Western blot analysis of PSD95 protein levels in the V1. (B) No significant differences in the PSD95  
 60 protein band intensity were detectable in visual cortex tissue of wildtype and quadruple knockout mice  
 61 ( $p = 0.85$ ,  $N = 8$ ). (C) RT-qPCR analyses revealed a comparable *Dlg4* mRNA expression in the visual  
 62 cortex of wildtype and quadruple knockout mice ( $p = 0.10$ ,  $N = 6$ ). (D) Western blot analysis of  
 63 VGLUT1 protein levels in the V1. (E) Comparable VGLUT1 protein band intensity in visual cortex  
 64 tissue of wildtype and quadruple knockout ( $p = 0.46$ ,  $N = 8$ ). (F) RT-qPCR analyses revealed  
 65 comparable *Slc17a7* (*VGLUT1*) mRNA expression in the visual cortex of wildtype and quadruple  
 66 knockout mice ( $p = 0.40$ ,  $N = 6$ ); 4xKO = quadruple knockout, *Dlg4* = *postsynaptic density protein*  
 67 *95*, PSD95 = postsynaptic density protein 95, *Slc17a7* = vesicular glutamate transporter 1, V1 =  
 68 primary visual cortex, VGLUT1 = vesicular glutamate transporter 1, WT = wildtype, \* =  $p < 0.05$  data  
 69 are shown as mean  $\pm$  SEM and SD.

70 **Supplementary Figure 6:** Analyses of parvalbumin-positive interneuron populations in the  
 71 retrosplenial-, secondary visual- and auditory cortex of wildtype and quadruple knockout mice. (A-F)  
 72 Representative coronal cortical brain slices of wildtype and quadruple KO double-labeled using a  
 73 specific antibody against parvalbumin and WFA. (G) The number of parvalbumin-positive cells was  
 74 comparable in the retrosplenial cortex in wildtype and quadruple knockout mice ( $p = 0.67$ ,  $N = 8$ ).  
 75 Furthermore, the number of parvalbumin-positive cells was comparable in the secondary visual cortex  
 76 ( $p = 0.11$ ,  $N = 8$ ) and the auditory cortex of wildtype and quadruple knockout mice ( $p = 0.61$ ,  $N = 8$ ).  
 77 4xKO = quadruple knockout, *Pvalb* = parvalbumin, WT = wildtype, WFA = *Wisteria floribunda*  
 78 agglutinin, \* =  $p < 0.05$ , data are shown as mean  $\pm$  SEM and SD, scale bars = 200  $\mu$ m.

79 **Supplementary Figure 7:** Analyses of parvalbumin and calretinin-positive interneuron populations in  
 80 the retrosplenial-, secondary visual- and auditory cortex of wildtype and quadruple knockout mice. (A-  
 81 F) Representative coronal cortical brain slices of wildtype and quadruple KO double-labeled using a  
 82 specific antibody against calretinin and WFA retrosplenial-, secondary visual- and auditory cortex of  
 83 wildtype and quadruple knockout mice. (G) The number of calretinin-positive cells was comparable in  
 84 the retrosplenial cortex between wildtype and quadruple knockout mice ( $p = 0.63$ ,  $N = 8$ ). Furthermore,  
 85 the number of calretinin-positive cells was comparable in the secondary visual cortex ( $p = 0.53$ ,  $N =$   
 86  $8$ ) and the auditory cortex of wildtype and quadruple knockout mice ( $p = 0.19$ ,  $N = 8$ ). 4xKO =  
 87 quadruple knockout, *Pvalb* = parvalbumin, WT = wildtype, WFA = *Wisteria floribunda* agglutinin, \*  
 88 =  $p < 0.05$ , data are shown as mean  $\pm$  SEM and SD, scale bars = 200  $\mu$ m.

89 **Supplement Figure 8:** Comparable *Otx2* internalization mediated by PNNs in quadruple knockout  
 90 and wildtype RSC and V1. (A-C, F-H) Representative images of an immunohistochemical double  
 91 staining with *Otx2* (green) and WFA (red) in the RSC of quadruple knockout and wildtype mice. White  
 92 arrows indicate *Otx2* and WFA double-positive cells. (D, I) WFA stained PNNs were automatically

93 recognized by the CellProfiler software. The green dotted area was recognized as WFA-positive cell,  
94 whereas purple dotted areas with insufficient signal were deprived. **(E, J)** Representation of WFA-  
95 positive cells recognized by the CellProfiler software. Intensities of WFA and Otx2 immunoreactivity  
96 were measured inside these areas. **(K)** Statistical evaluation of WFA intensity measurements revealed  
97 a significant reduction in the quadruple knockout RSC ( $p < 0.05$ ,  $N = 8$ ) and V1 ( $p < 0.005$ ,  $N = 8$ ) in  
98 comparison to the wildtype. **(L)** In contrast, intensity measurements of Otx2 within the PNNs appeared  
99 to be comparable between wildtype and quadruple knockout in RSC ( $p = 0.56$ ,  $N = 8$ ) and V1 ( $p =$   
100  $0.38$ ,  $N = 8$ ), indicating no impaired internalization of Otx2 through the disruption of the PNNs in the  
101 quadruple knockout. 4xKO = quadruple knockout, Otx2 = orthodenticle homeobox 2, RSC =  
102 retrosplenial cortex, V1 = primary visual cortex, WFA = Wisteria floribunda agglutinin, WT =  
103 wildtype, \*\* =  $p < 0.005$ , \* =  $p < 0.05$  data are shown as mean  $\pm$  standard error mean and standard  
104 deviation, scale bars A = 20  $\mu\text{m}$ .

105

106

107 17 SUPPLEMENTARY FIGURES

108 Supplementary Figure 1:

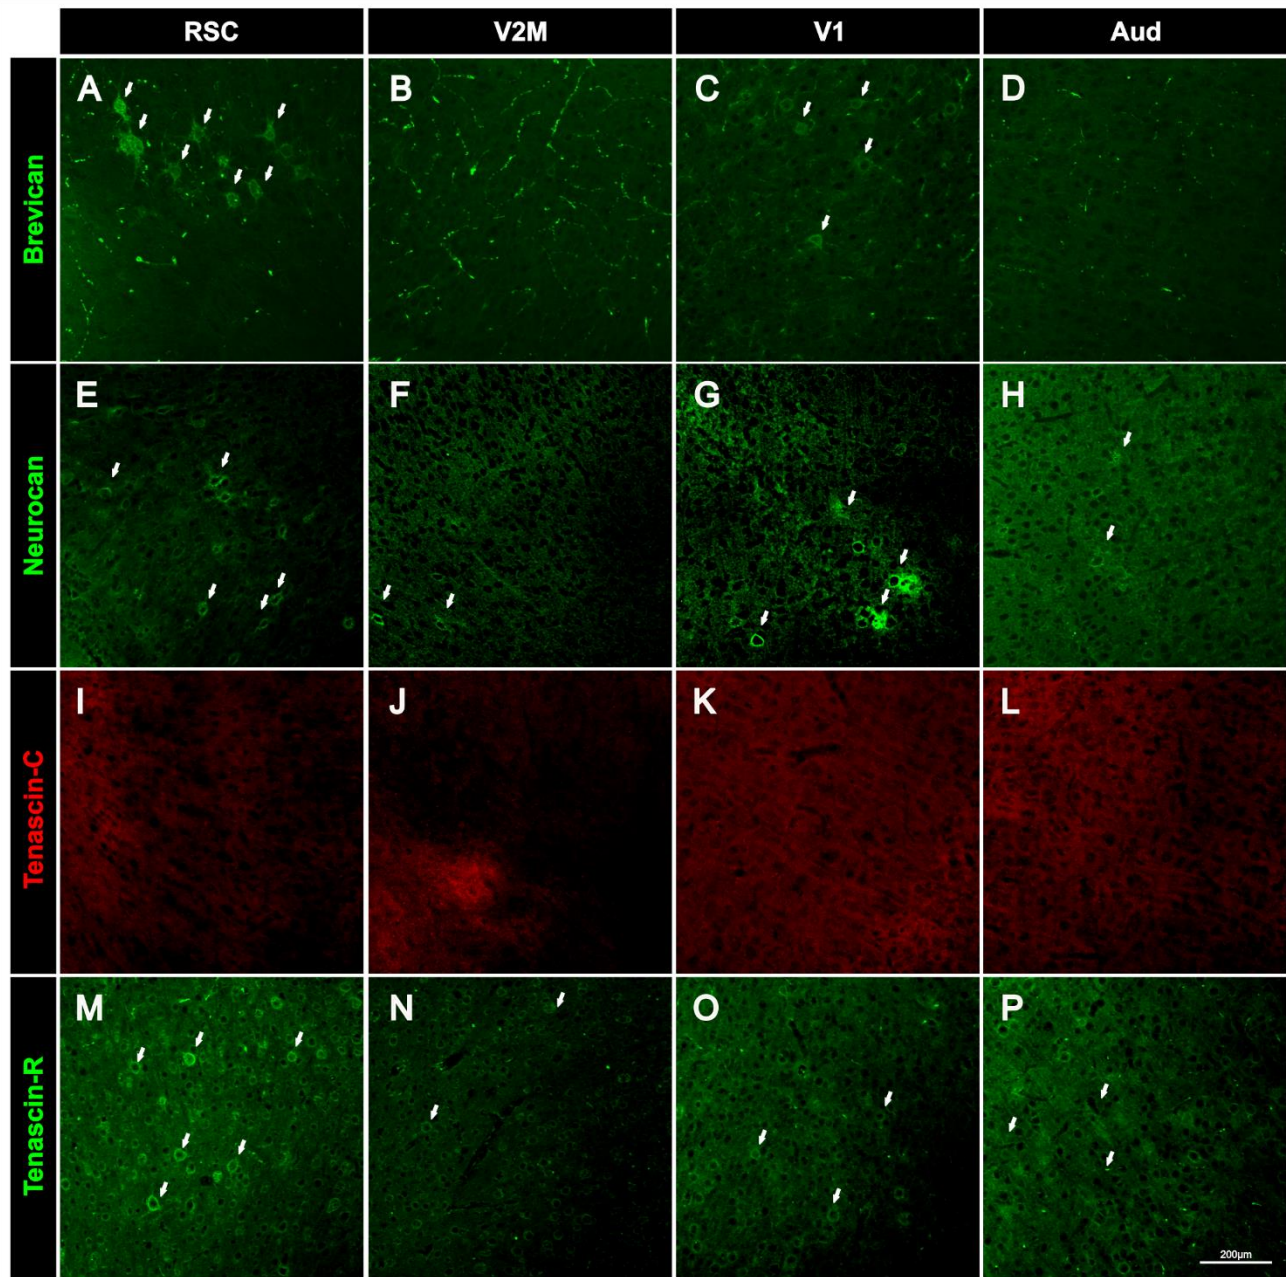

109

110 Supplementary Figure 2:

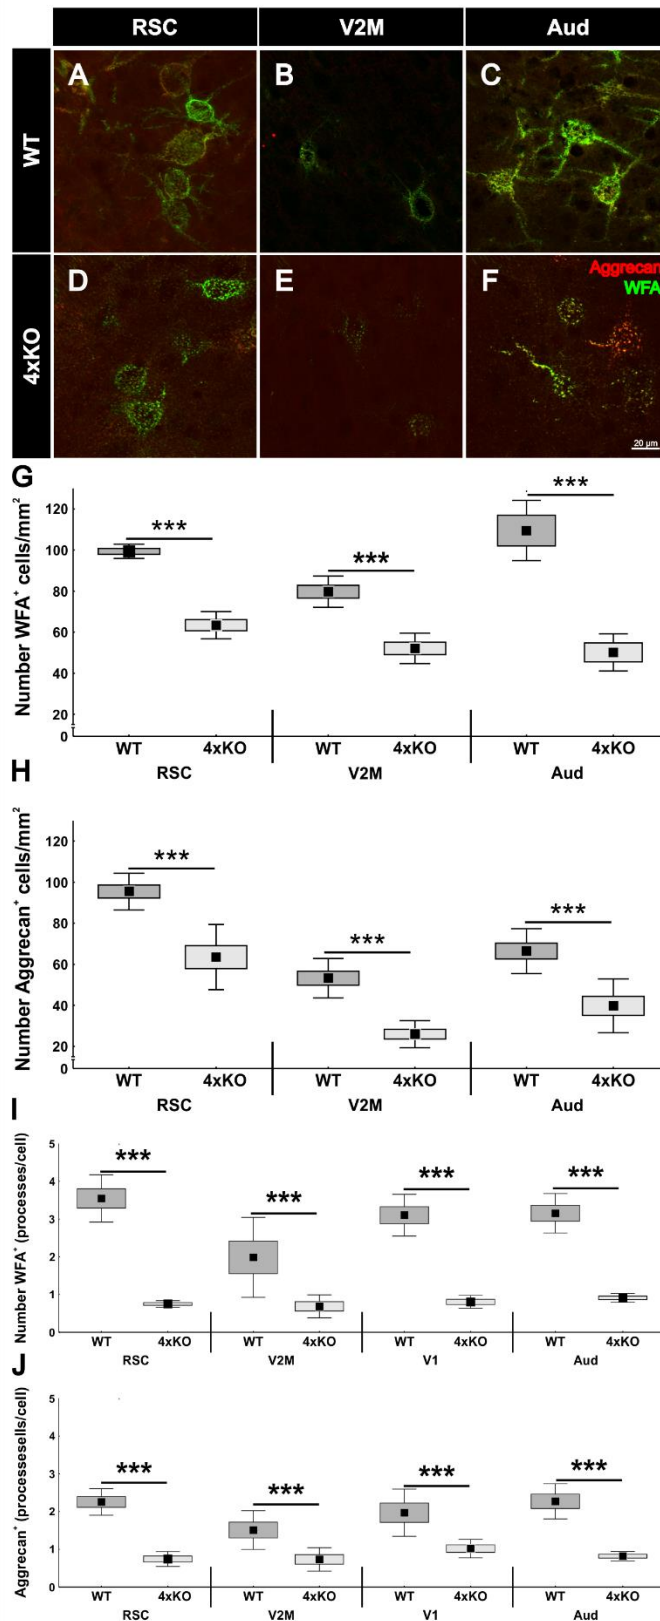

111  
112

113 Supplementary Figure 3:

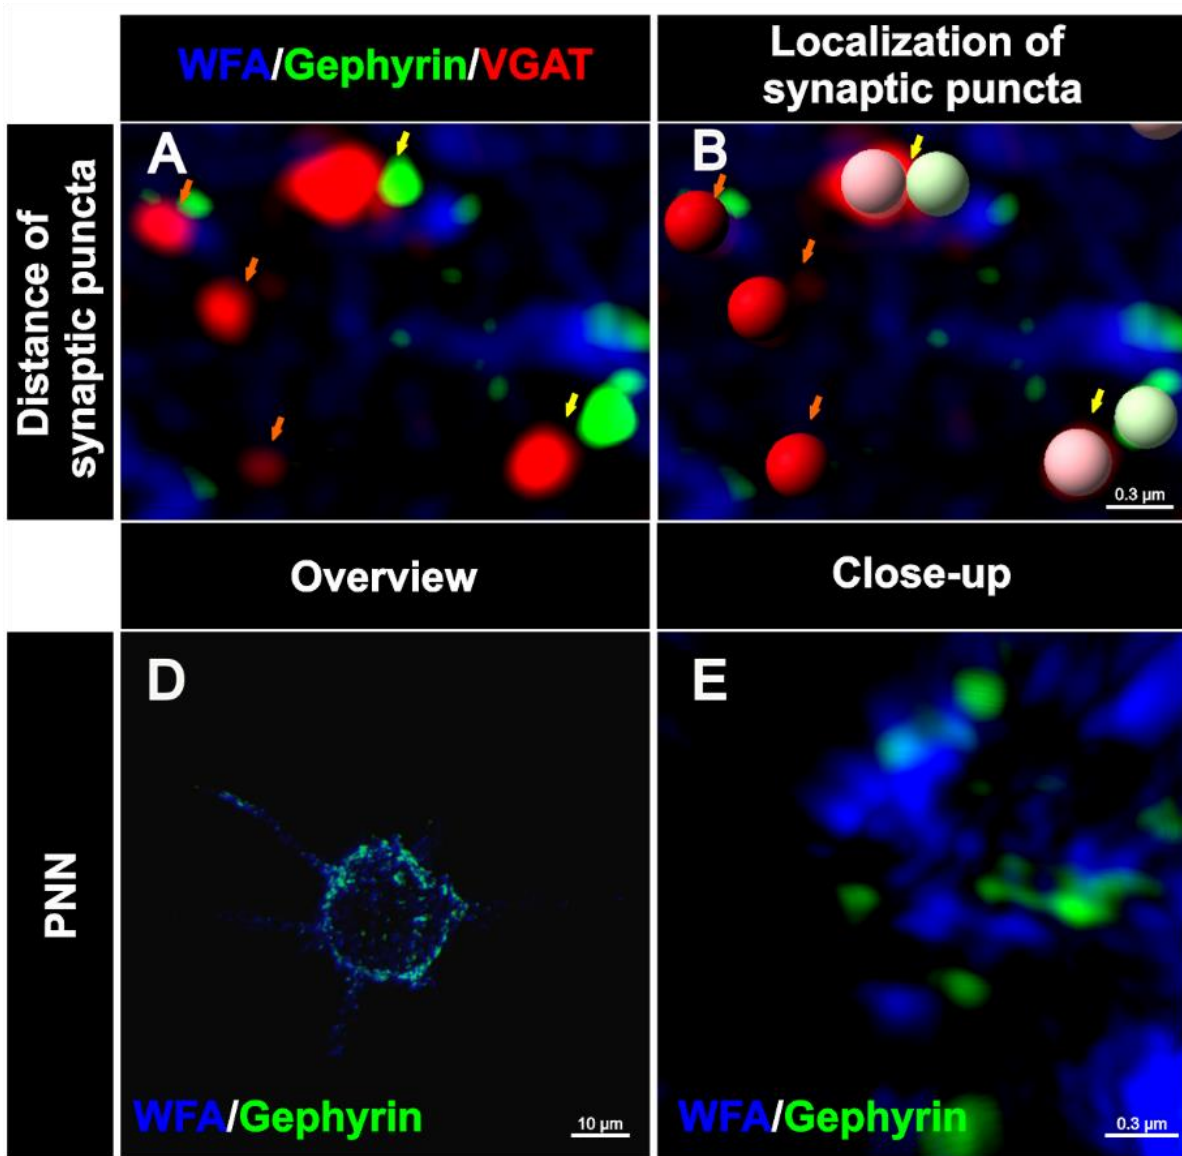

114

115

116 **Supplementary Figure 4:**

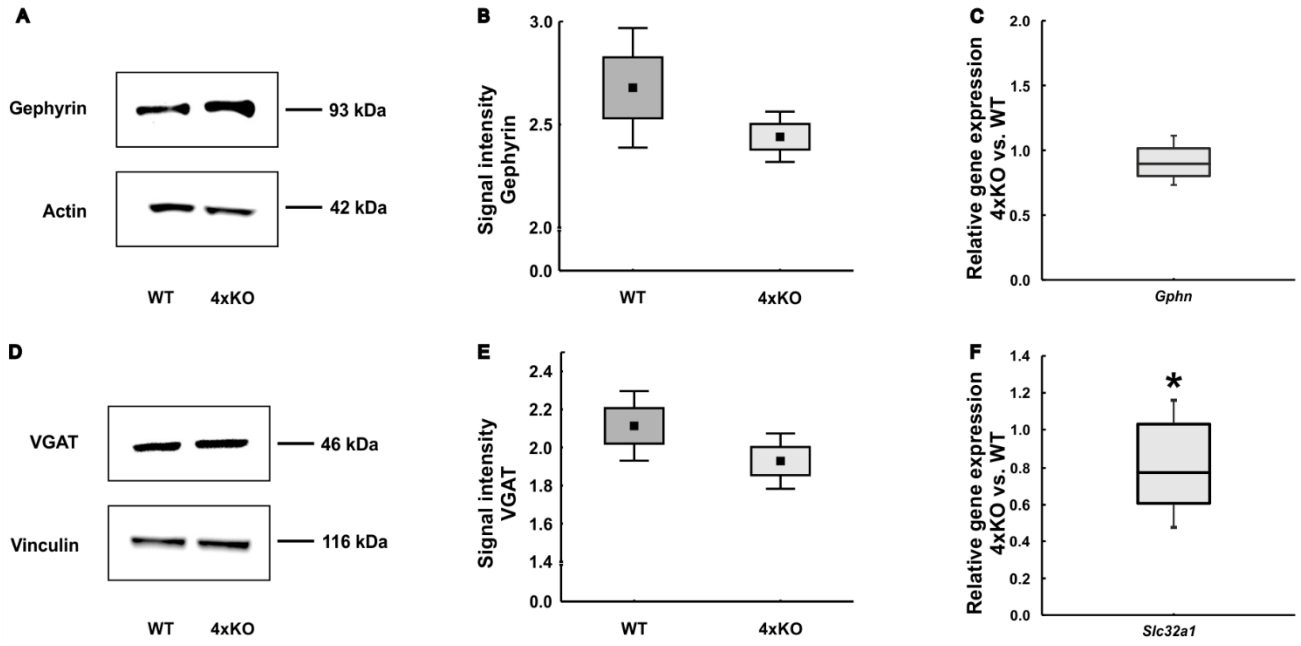

117

118

119 **Supplementary Figure 5:**

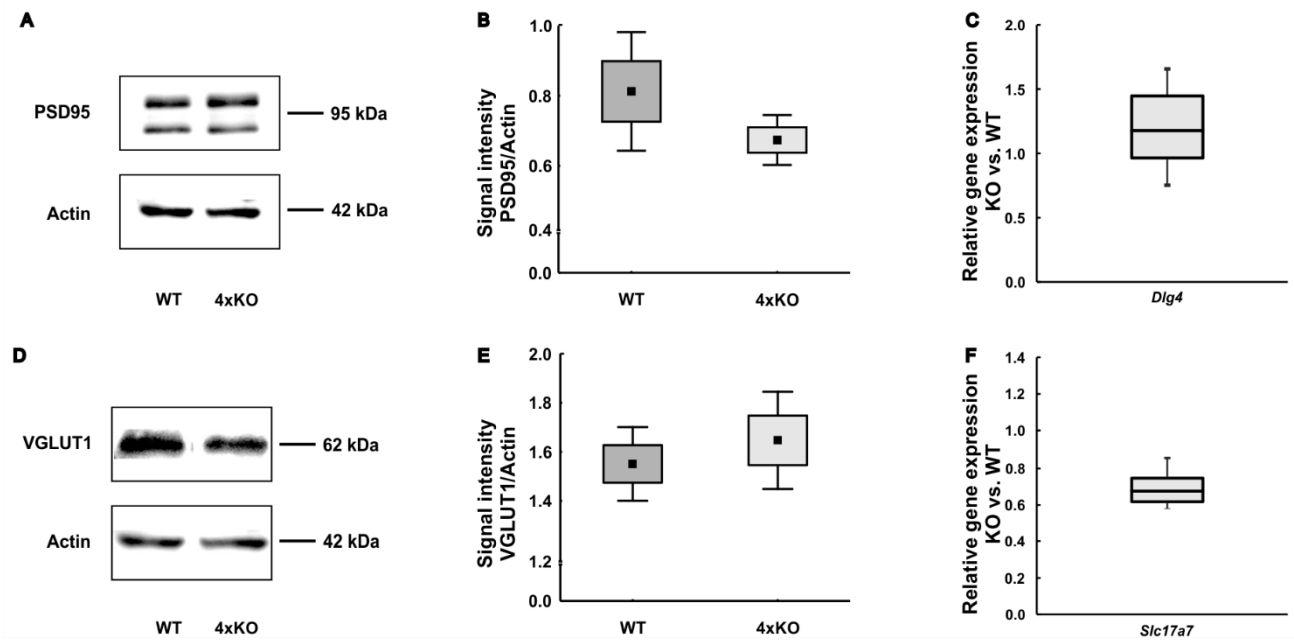

120

121



122 Supplementary Figure 6:

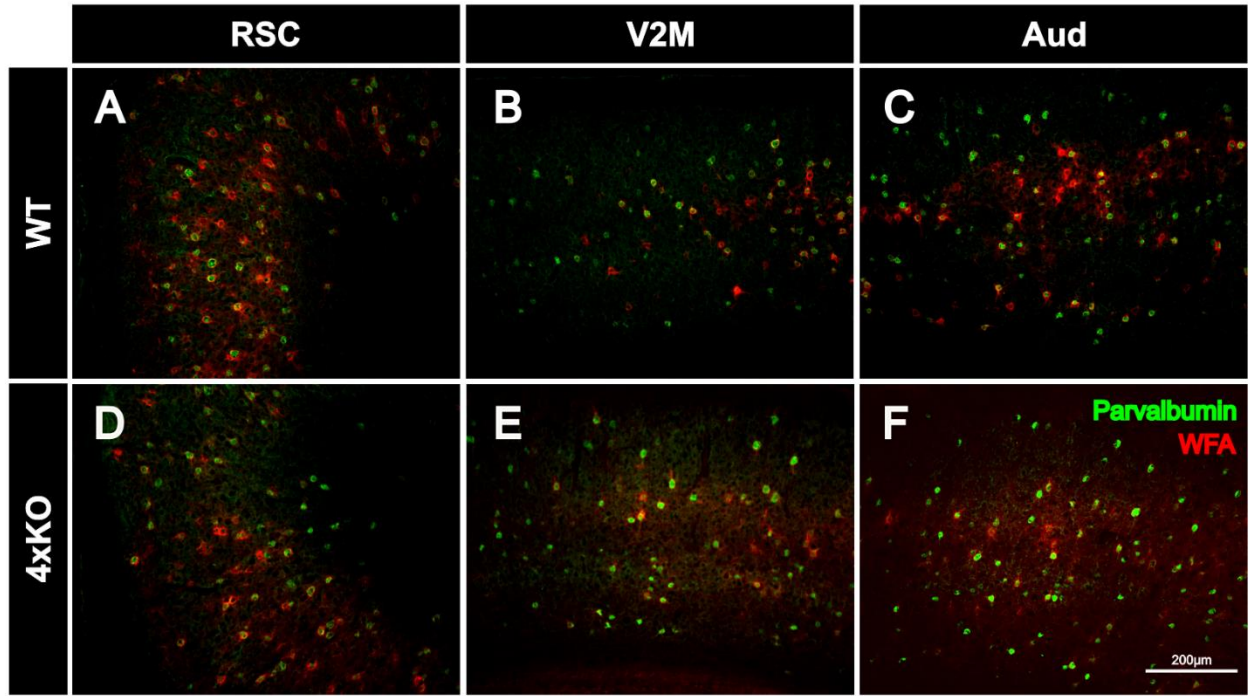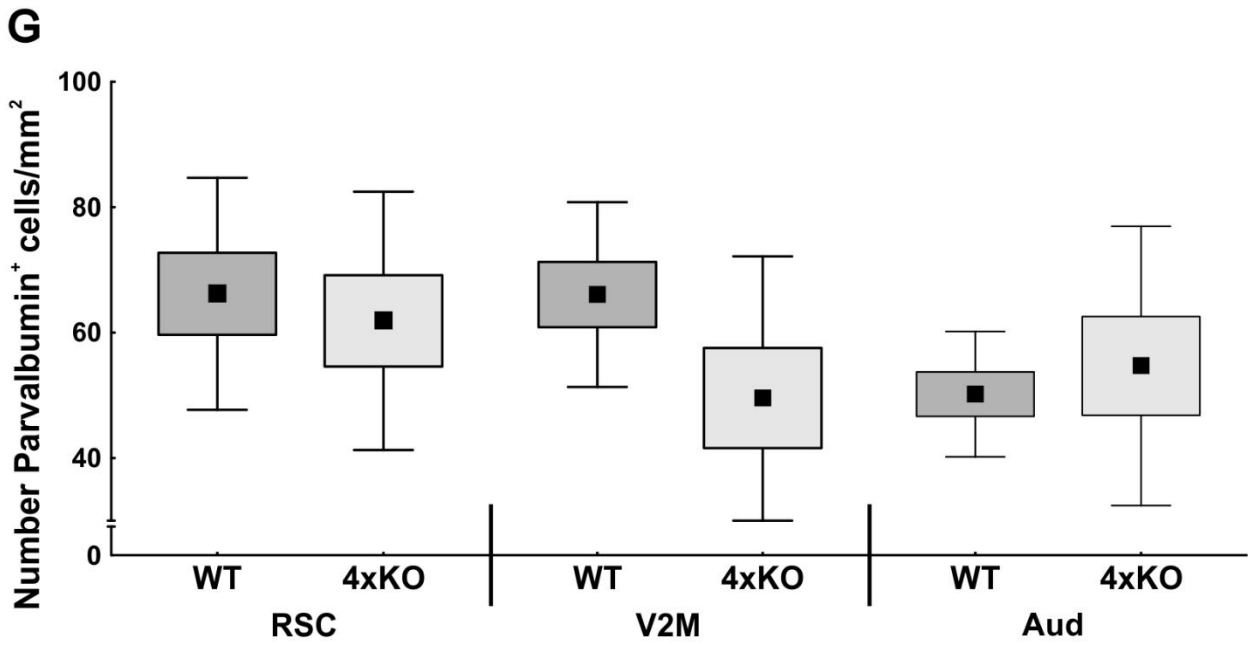

123

124

125 Supplementary Figure 7:

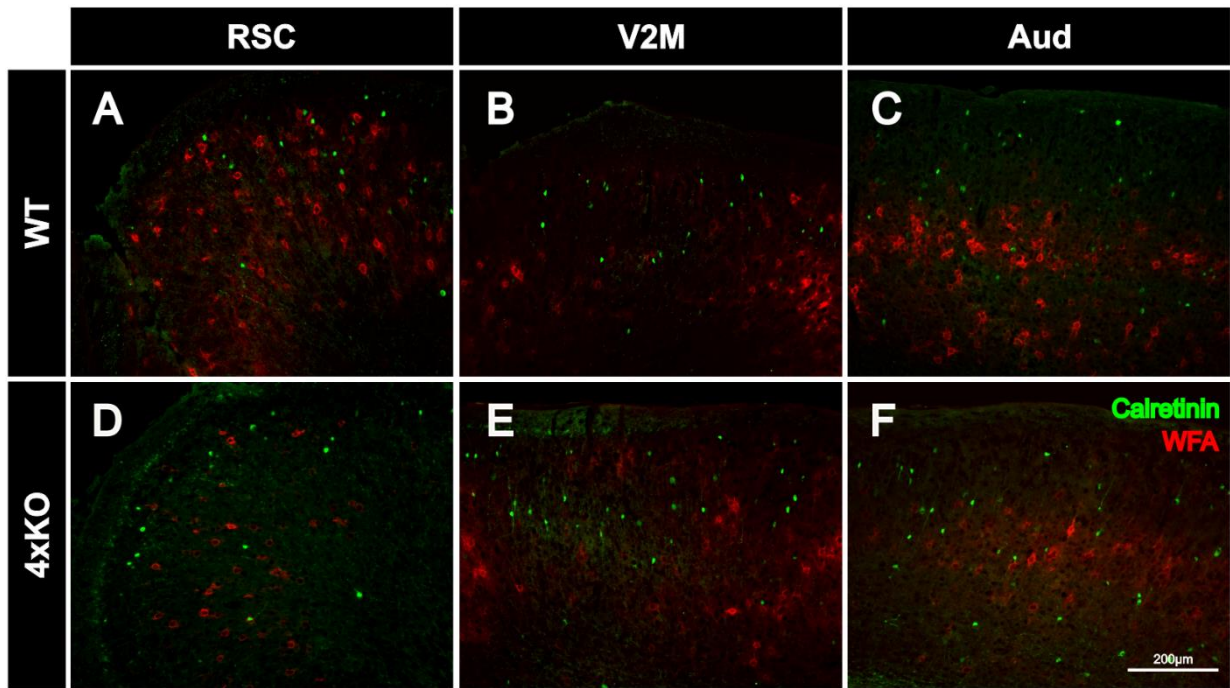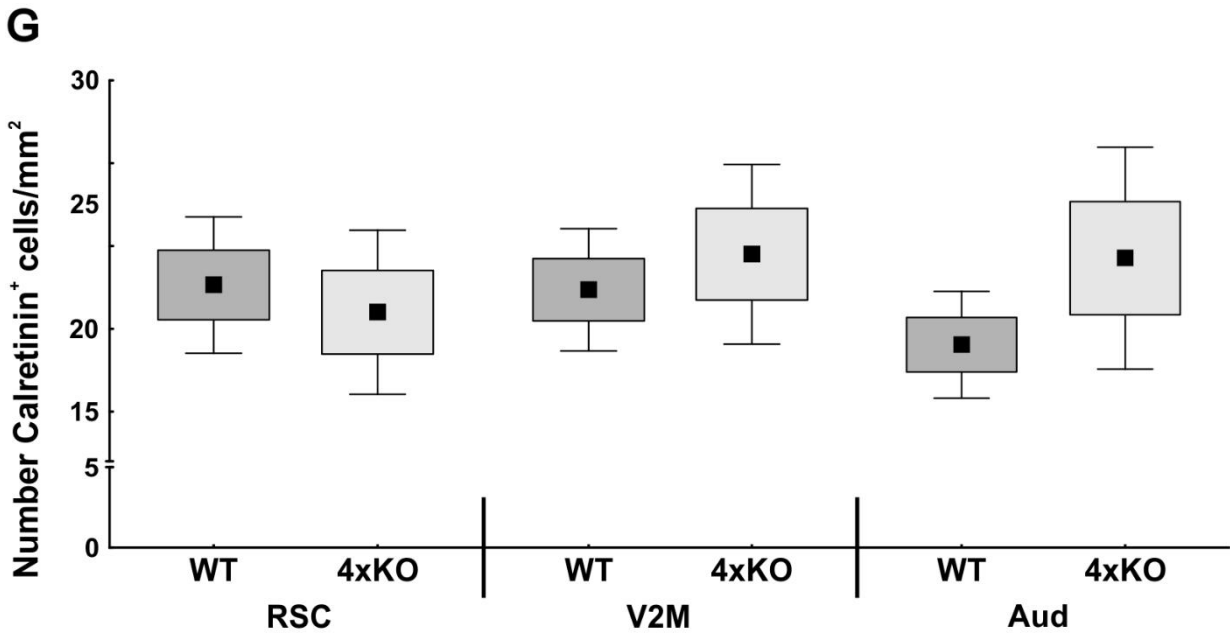

126

127

128 **Supplementary Figure 8:**

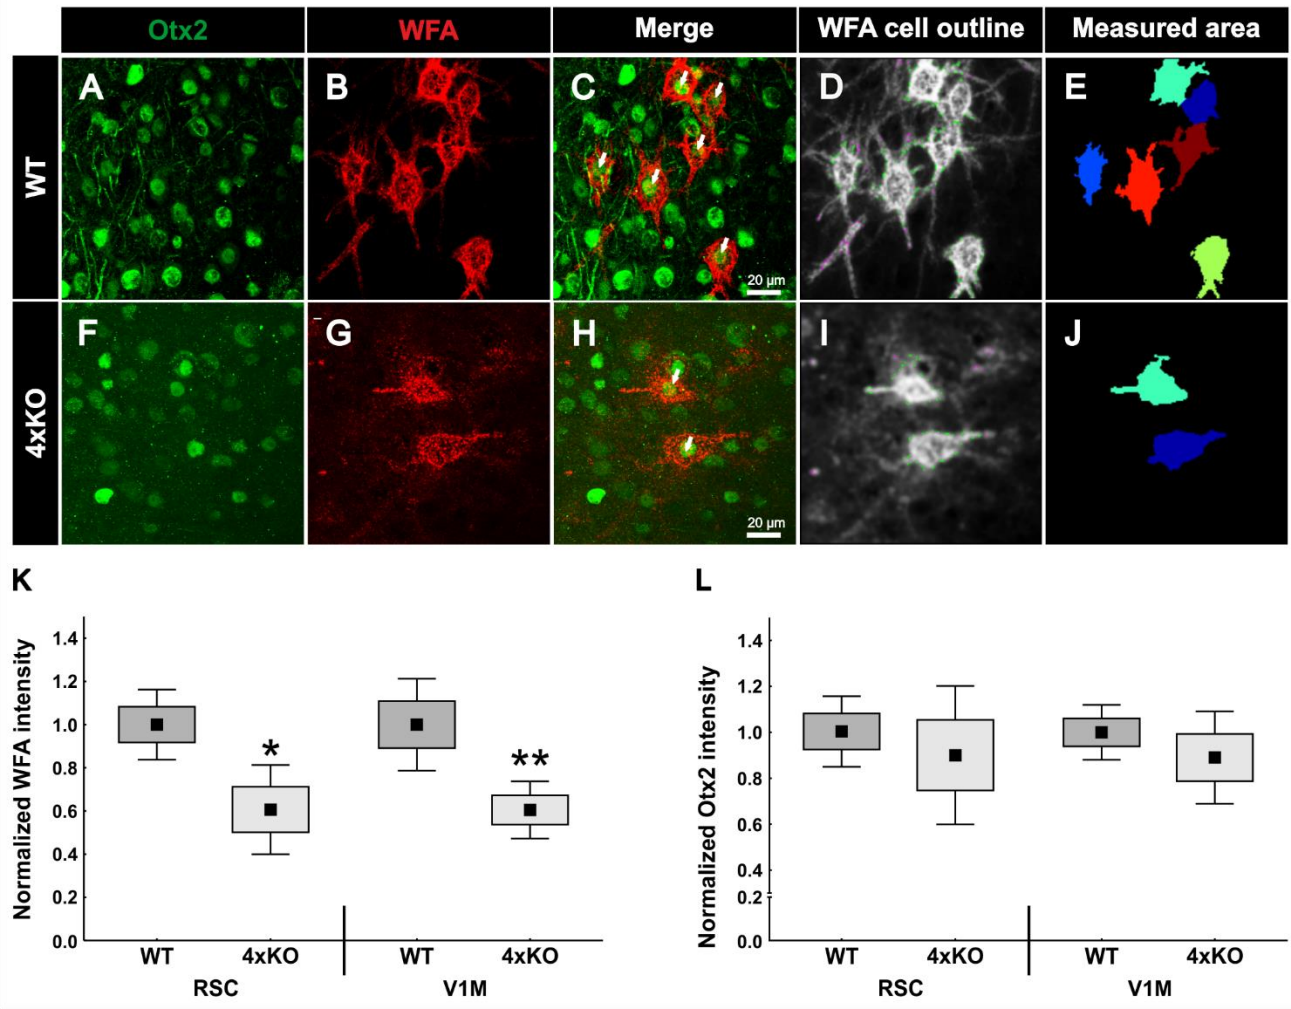

129
